# Supplementary material
Source: HighWire-hosted journal article supplement (https://sti.bmj.com/content/95/7/505)
Supplement: inline-supplementary-material-1 [file inline-supplementary-material-1.pdf]

|                                                | MSM<br>n=51            | Heterosexual<br>men<br>n=106 | Women<br>n=325         |
|------------------------------------------------|------------------------|------------------------------|------------------------|
| T1                                             | % (n)/ median<br>(IQR) | % (n)/ median<br>(IQR)       | % (n)/ median<br>(IQR) |
| Age                                            |                        |                              |                        |
| 16-20 years                                    | 7.8 (4)                | 11.3 (12)                    | 33.5 (109)             |
| 21-25 years                                    | 23.5 (12)              | 38.7 (41)                    | 37.2 (121)             |
| ≥26 years                                      | 68.6 (35)              | 49.1 (52)                    | 28.9 (94)              |
| Western nationality                            | 5.9 (3)                | 89.6 (95)                    | 97.5 (317)             |
| Number of sex partners in<br>the past 6 months |                        |                              |                        |
| 1                                              | 9.8 (5)                | 24.5 (26)                    | 31.4 (102)             |
| 2                                              | 13.7 (7)               | 27.4 (29)                    | 30.5 (99)              |
| ≥3                                             | 76.5 (39)              | 47.2 (50)                    | 37.8 (123)             |
| Antibiotic use <1 month                        | 5.9 (3)                | 0.9 (1)                      | 10.8 (35)              |
| Any STI ever                                   |                        |                              |                        |
| Yes                                            | 57.1 (28)              | 23.1 (24)                    | 21.6 (70)              |
| Among CT positives                             |                        |                              |                        |
| Urogenital symptoms                            | 25.7 (9)               | 41.2 (42)                    | 59.6 (186)             |
| Proctitis                                      | 8.6 (3)                | 1.0 (1)                      | 4.8 (15)               |
| Among NG positives                             |                        |                              |                        |
| Urogenital symptoms                            | 21.1 (4)               | 33.3 (1)                     | 46.7 (7)               |
| Proctitis                                      | 15.8 (3)               | 100 (3)                      | 0                      |
| TPHA positivity                                | 5.9 (3)                | 0                            | 0                      |
| HIV                                            | 13.7 (7)               | 0                            | 0                      |
| CT/NG co-infection                             | 7.8 (4)                | 0.9 (1)                      | 1.2 (4)                |
| <b>T1-T2 interval<sup>1</sup></b>              |                        |                              |                        |
| Antibiotic use                                 | 7.8 (4)                | 1.9 (2)                      | 6.5 (21)               |
| Among CT positives                             |                        |                              |                        |
| Urogenital symptoms                            | 22.9 (8)               | 32.4 (33)                    | 41.7 (130)             |
| Proctitis                                      | 25.7 (9)               | 2.9 (3)                      | 4.8 (15)               |
| Among NG positives                             |                        |                              |                        |
| Urogenital symptoms                            | 21.1 (4)               | 3 (100)                      | 13.3 (2)               |
| Proctitis                                      | 21.1 (4)               | 33.3 (1)                     | 6.7 (1)                |
| Unprotected vaginal<br>intercourse             | 11.8 (6)               | 50.0 (53)                    | 30.5 (99)              |
| Unprotected anal<br>intercourse                | 19.6 (10)              | 0.9 (1)                      | 1.2 (4)                |

\* <sup>1</sup> 59 consultations had a missing questionnaire about the T1 - T2 interval.

Urogenital symptoms were defined if at least one of the following was reported: genital discharge, bleeding, itching, swelling, pain, burning sensation and more frequent urination. Anorectal symptoms were defined if at least one of the following was reported: rectal discharge, bleeding, pain, redness, burning sensation, or itching.
